# Supplementary material for: Investigation of SO2tolerance of Ce-modified activated semi-coke based catalysts for the NO + CO reaction
Source: Royal Society of Chemistry journal article supplement (doi:10.1039/c7ra10721h), 2017-01-01
Supplement: c7ra10721h1.pdf [file c7ra10721h1.pdf]

## Electronic Supplementary Information

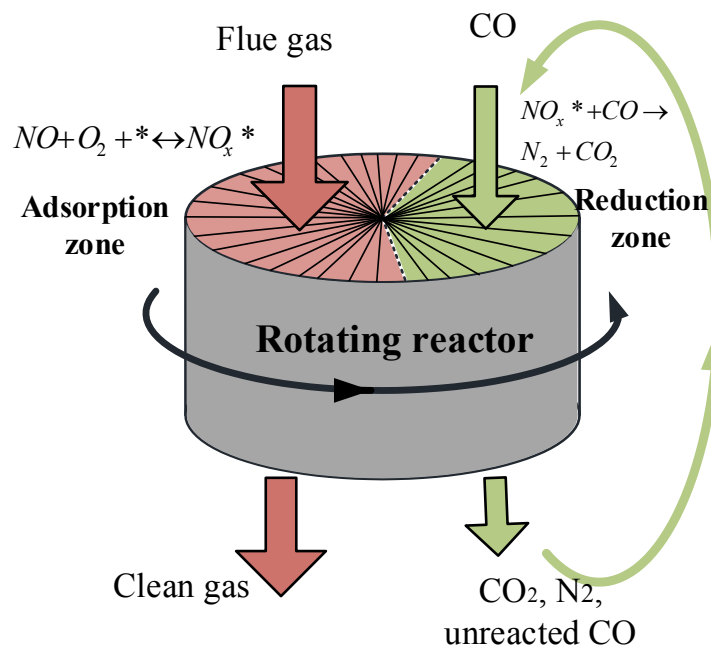

Fig. S1 Schematic diagram of the rotary denitration reactor.

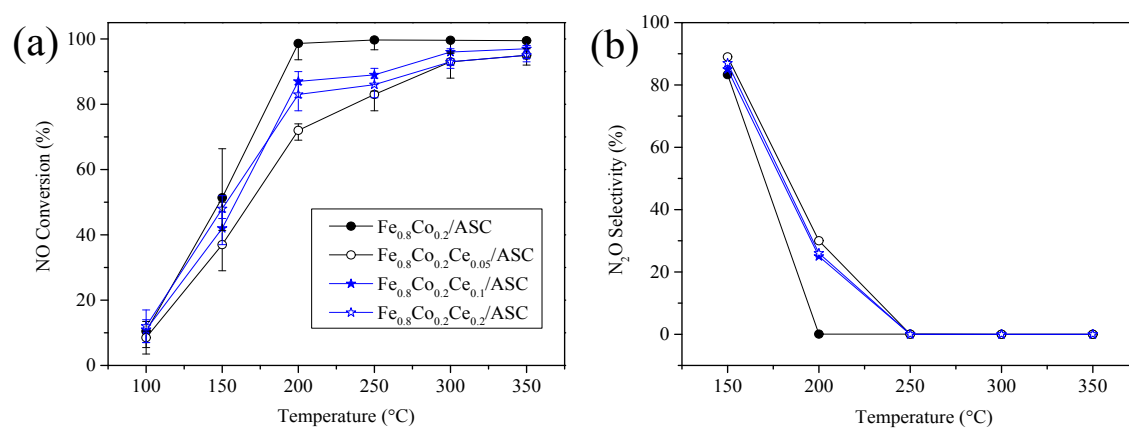

Fig. S2 NO conversion (a) and  $\text{N}_2\text{O}$  selectivity (b) of catalysts in the reduction of NO. Reaction conditions: 2000 ppm CO, 1000 ppm NO and balance  $\text{N}_2$ , GHSV=6,000  $\text{h}^{-1}$ .

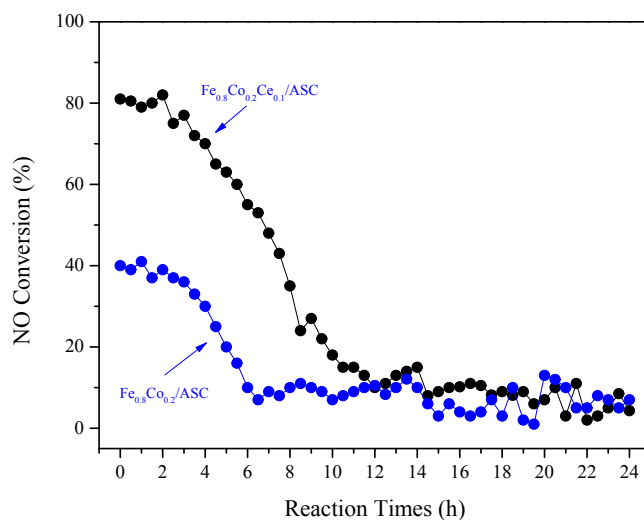

Fig. S3 NO conversion of catalysts. Reaction conditions: 2000 ppm CO, 1000 ppm NO, 200 ppm SO<sub>2</sub> and balance by N<sub>2</sub>, at 250 °C, GHSV=6,000 h<sup>-1</sup>.

It can be found in Fig. S3, the NO conversion decreases with the reaction times for the two catalysts. This demonstrated that the SO<sub>2</sub> in the flue gas can deactivate severely the catalytic performance of the ASC-based catalysts. However, we can find that the addition of Ce enhances the SO<sub>2</sub> tolerance. When SO<sub>2</sub> was introduced into the flue gas, the NO conversion kept at 40% in the time range of 0-2h for Fe<sub>0.8</sub>Co<sub>0.2</sub>/ASC, while this value for Fe<sub>0.8</sub>Co<sub>0.2</sub>Ce<sub>0.1</sub>/ASC was approximate 80%, and the activity continued about 3h. As for the deactivation time point, it is 6 h for Fe<sub>0.8</sub>Co<sub>0.2</sub>/ASC, fortunately, it reached to approximate 12h for the Ce-doped catalysts.

Table S1 ICP results of the prepared catalysts.

| Samples                                                     | Fe loading wt. % | Co loading wt. % |
|-------------------------------------------------------------|------------------|------------------|
| $\text{Fe}_{0.8}\text{Co}_{0.2}/\text{ASC}$                 | 5.58             | 1.49             |
| $\text{Fe}_{0.8}\text{Co}_{0.2}\text{Ce}_{0.05}/\text{ASC}$ | 3.81             | 1.03             |
| $\text{Fe}_{0.8}\text{Co}_{0.2}\text{Ce}_{0.1}/\text{ASC}$  | 4.22             | 1.12             |
| $\text{Fe}_{0.8}\text{Co}_{0.2}\text{Ce}_{0.2}/\text{ASC}$  | 3.52             | 1.07             |

Table S2 Binding energies of Ce 3d 5/2 and 3d 3/2 spin-orbit doublets.

| Peak assignment | Ce species       | Binding energy (eV) |
|-----------------|------------------|---------------------|
| V <sub>0</sub>  | Ce <sup>3+</sup> | 881.0               |
| V               | Ce <sup>4+</sup> | 882.7               |
| V'              | Ce <sup>3+</sup> | 885.6               |
| V''             | Ce <sup>4+</sup> | 888.7               |
| V'''            | Ce <sup>4+</sup> | 898.4               |
| U <sub>0</sub>  | Ce <sup>3+</sup> | 899.1               |
| U               | Ce <sup>4+</sup> | 901.3               |
| U'              | Ce <sup>3+</sup> | 904.0               |
| U''             | Ce <sup>4+</sup> | 907.2               |
| U'''            | Ce <sup>4+</sup> | 916.9               |

Table S3 XPS results of the prepared catalysts under different pretreatment.

| Samples                                                                                    | Surface Components   |                      |                    |                      |                                   |
|--------------------------------------------------------------------------------------------|----------------------|----------------------|--------------------|----------------------|-----------------------------------|
|                                                                                            | Fe <sup>3+</sup> (%) | Co <sup>3+</sup> (%) | O <sub>α</sub> (%) | Ce <sup>3+</sup> (%) | SO <sub>4</sub> <sup>2-</sup> (%) |
| Fresh Fe <sub>0.8</sub> Co <sub>0.2</sub> /ASC                                             | 46.49                | 45.19                | 55.27              |                      |                                   |
| SO <sub>2</sub> -pretreated Fe <sub>0.8</sub> Co <sub>0.2</sub> /ASC                       | 39.31                | 42.99                | 47.46              |                      | 82.69                             |
| SO <sub>2</sub> +NO-pretreated Fe <sub>0.8</sub> Co <sub>0.2</sub> /ASC                    | 45.39                | 43.79                | 48.26              |                      | 95.57                             |
| Fresh Fe <sub>0.8</sub> Co <sub>0.2</sub> Ce <sub>0.05</sub> /ASC                          | 56.89                | 51.45                | 59.84              | 38.71                |                                   |
| SO <sub>2</sub> -pretreated Fe <sub>0.8</sub> Co <sub>0.2</sub> Ce <sub>0.05</sub> /ASC    | 44.44                | 48.41                | 60.73              | 46.08                | 71.75                             |
| SO <sub>2</sub> +NO-pretreated Fe <sub>0.8</sub> Co <sub>0.2</sub> Ce <sub>0.05</sub> /ASC | 43.50                | 51.39                | 61.80              | 41.51                | 88.99                             |
| Fresh Fe <sub>0.8</sub> Co <sub>0.2</sub> Ce <sub>0.1</sub> /ASC                           | 53.02                | 51.41                | 53.64              | 43.91                |                                   |
| SO <sub>2</sub> -pretreated Fe <sub>0.8</sub> Co <sub>0.2</sub> Ce <sub>0.1</sub> /ASC     | 46.49                | 50.43                | 56.22              | 47.13                | 51.80                             |
| SO <sub>2</sub> +NO-pretreated Fe <sub>0.8</sub> Co <sub>0.2</sub> Ce <sub>0.1</sub> /ASC  | 42.40                | 47.14                | 54.28              | 47.95                | 52.08                             |
| Fresh Fe <sub>0.8</sub> Co <sub>0.2</sub> Ce <sub>0.2</sub> /ASC                           | 44.93                | 49.93                | 45.90              | 35.73                |                                   |
| SO <sub>2</sub> -pretreated Fe <sub>0.8</sub> Co <sub>0.2</sub> Ce <sub>0.2</sub> /ASC     | 52.96                | 48.42                | 41.66              | 37.99                | 69.19                             |
| SO <sub>2</sub> +NO-pretreated Fe <sub>0.8</sub> Co <sub>0.2</sub> Ce <sub>0.2</sub> /ASC  | 42.40                | 50.29                | 49.02              | 36.83                | 75.21                             |

Table S4 XRF results of prepared catalysts under different conditions.

| Samples                                                                                    | Surface SO <sub>3</sub> (%) | StdErr(%) |
|--------------------------------------------------------------------------------------------|-----------------------------|-----------|
| Fresh Fe <sub>0.8</sub> Co <sub>0.2</sub> /ASC                                             | 0.45                        | 0.09      |
| SO <sub>2</sub> -pretreated Fe <sub>0.8</sub> Co <sub>0.2</sub> /ASC                       | 2.46                        | 0.11      |
| SO <sub>2</sub> +NO-pretreated Fe <sub>0.8</sub> Co <sub>0.2</sub> /ASC                    | 1.87                        | 0.07      |
| Fresh Fe <sub>0.8</sub> Co <sub>0.2</sub> Ce <sub>0.05</sub> /ASC                          | 0.74                        | 0.15      |
| SO <sub>2</sub> -pretreated Fe <sub>0.8</sub> Co <sub>0.2</sub> Ce <sub>0.05</sub> /ASC    | 2.95                        | 0.21      |
| SO <sub>2</sub> +NO-pretreated Fe <sub>0.8</sub> Co <sub>0.2</sub> Ce <sub>0.05</sub> /ASC | 2.61                        | 0.12      |
| Fresh Fe <sub>0.8</sub> Co <sub>0.2</sub> Ce <sub>0.1</sub> /ASC                           | 0.65                        | 0.09      |
| SO <sub>2</sub> -pretreated Fe <sub>0.8</sub> Co <sub>0.2</sub> Ce <sub>0.1</sub> /ASC     | 3.41                        | 0.13      |
| SO <sub>2</sub> +NO-pretreated Fe <sub>0.8</sub> Co <sub>0.2</sub> Ce <sub>0.1</sub> /ASC  | 2.56                        | 0.15      |
| Fresh Fe <sub>0.8</sub> Co <sub>0.2</sub> Ce <sub>0.2</sub> /ASC                           | 0.81                        | 0.17      |
| SO <sub>2</sub> -pretreated Fe <sub>0.8</sub> Co <sub>0.2</sub> Ce <sub>0.2</sub> /ASC     | 3.94                        | 0.13      |
| SO <sub>2</sub> +NO-pretreated Fe <sub>0.8</sub> Co <sub>0.2</sub> Ce <sub>0.2</sub> /ASC  | 2.99                        | 0.18      |

Where, all the sulfates were presented as SO<sub>3</sub>.

To further investigate the surface sulfates after exposure to NO and SO<sub>2</sub>, X-ray fluorescence (XRF) testing was performed. It can be found that for the fresh samples, the percentage of the surface sulfates is 0.4-0.8 wt.%, this is because there is S element in the ASC. As the introduction of SO<sub>2</sub> into the feed gas, the amount of surface sulfates gets increasing. Besides, the percentage is increasing with the loading amount of Ce. We speculate this is ascribed to the fast generation of cerium sulfates. When NO and SO<sub>2</sub> are co-added into the reaction flue, the slight decreasing is observed. It is reasonable to demonstrate there is some interactions between NO and SO<sub>2</sub> on the surface of catalysts.
